# Supplementary material
Source: publisher figshare collection journal article supplement (https://tandf.figshare.com/ndownloader/files/18743675)
Supplement: Supplementary file 1 [file 18743675]

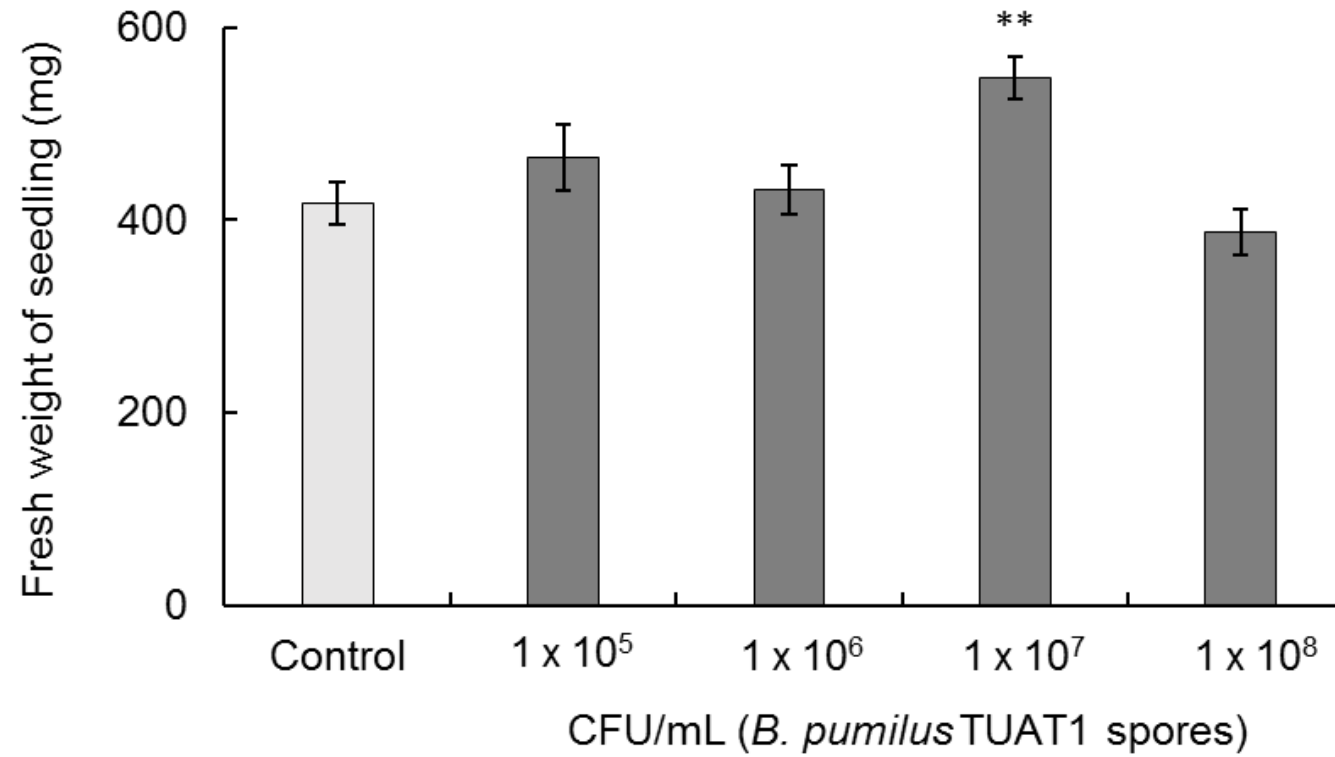

**Supplemental Figure S1.** Effects of spore suspension concentration *B. pumilus* TUAT1 strain on the growth (fresh weight) of seedlings of *O. sativa* cv. Hitomebore at 3 weeks after sowing. Inocula consisted of 4 mL of water or bacterial suspensions and were added to the soil of each seedling once weekly from just after sowing. Values are provided as mean  $\pm$  SE ( $n = 8$ ). \*\* indicates significant differences at the 1% level, compared to the control-inoculated plants, as determined by t-test.
